# Supplementary material for: Synergistic catalysis of chloroalkane dehydrochlorination with acetylene hydrochlorination by immobilized ionic liquid–metal ion co-catalysts: a DFT study
Source: Royal Society of Chemistry journal article supplement (doi:10.1039/d5cy00301f), 2025-01-01
Supplement: d5cy00301f1.pdf [file d5cy00301f1.pdf]

## Supporting Information

### **Synergistic catalysis of chloroalkanes dehydrochlorination with acetylene hydrochlorination by immobilized ionic liquid-metal co- catalysts: A DFT study**

Yangzhen Jin, Yebin Zhou, Pengze Zhang, Qiuyuan Xiang, Kunming Liu, Yi Liu\*, Chunshan Lu\*,  
Xiaonian Li\*

## Table of Contents

**Figure S1.** The structures of metal anions and the adsorption models of TCE, HCl and acetylene on these metal anions.

**Figure S2.** The structures of metal salts and the adsorption models of TCE, HCl and acetylene on these metal anions.

**Figure S3.**  $\Delta G$  of dehydrochlorination of TCE and acetylene hydrochlorination without catalysts.

**Figure S4**  $\text{CuCl}_2$  catalyzed hydrochlorination mechanism pathways at 260 °C: a)  $\Delta G$  of  $\text{CuCl}_2$  catalyzed mechanism; b) structures of adsorption and transition states.

**Figure S5.** The adsorption of varying amounts of  $\text{CuCl}_2$  in TPPC.

**Figure S6.** Partial structures of  $[\text{Cl-CuCl}]^-$  catalyzed dehydrochlorination mechanism pathways.

**Figure S7.** Partial structures of  $\text{CuCl}$  catalytic acetylene hydrochlorination pathways.

**Figure S8.** Partial structures of  $\text{CuCl}$  catalytic dehydrochlorination pathways.

**Figure S9.** The structures of varying amounts of  $\text{CuCl}$  in TPPC.

**Figure S10.** The structures of two  $\text{CuCl}$  ionic pairs in varying amounts of TPPC.

**Figure S11.** Ionic pairs structures and adsorption models.

**Figure S12**  $\text{KCl-CuCl}$  catalyzed hydrochlorination mechanism pathways at 260 °C: a)  $\Delta G$  of  $\text{KCl-CuCl}$  catalyzed mechanism; b) structures of adsorption and transition states.

**Figure S13.** Partial structures of dehydrochlorination (a) and acetylene hydrochlorination (b) pathways.

**Figure S14.** The structures of varying amounts of  $\text{KCl}$  in TPPC- $\text{CuCl}$ .

**Figure S15.**  $13\text{KCl-CuCl}$  catalyzed mechanism pathways, a) b) the structure of  $13\text{KCl-CuCl}$ ; b)  $13\text{KCl-CuCl}$  catalyzed dehydrochlorination for VDC; c)  $\Delta G$  of  $[\text{Cl-}13\text{KCl-CuCl}]^-$  catalyzed dehydrochlorination; d)  $\Delta G$  of  $13\text{KCl-CuCl}$  catalyzed acetylene hydrochlorination pathway.

**Figure S16.** The structures of  $[\text{Cl-}13\text{KCl-CuCl}]^-$  catalyzed dehydrochlorination pathway.

**Figure S17.** The structures of  $13\text{KCl-CuCl}$  catalyzed acetylene hydrochlorination pathway.

**Figure S18.** Partial structures in generation pathways of copper acetylide.

**Figure S19.** The adsorption  $\Delta G$  of olefin products on  $\text{CuCl}$ ,  $\text{CuCl-CuCl}$  and  $[\text{Cl-CuCl}]^-$  at 260 °C.

**Figure S20.**  $[\text{Cl-CuCl}_2\text{-KCl}]^-$  catalyzed dehydrochlorination mechanism pathways at 260 °C.

**Table S1.** The adsorption  $\Delta G_{20\text{ °C}}$  and  $\Delta G_{260\text{ °C}}$  of  $\text{HCl}$ ,  $\text{C}_2\text{H}_2$  and  $\text{TCE}$  at TPPC- $\text{CuCl}$ , TPPC- $\text{CuCl}_2$  and TPPC- $\text{KCl-CuCl}$ . (kJ/mol)

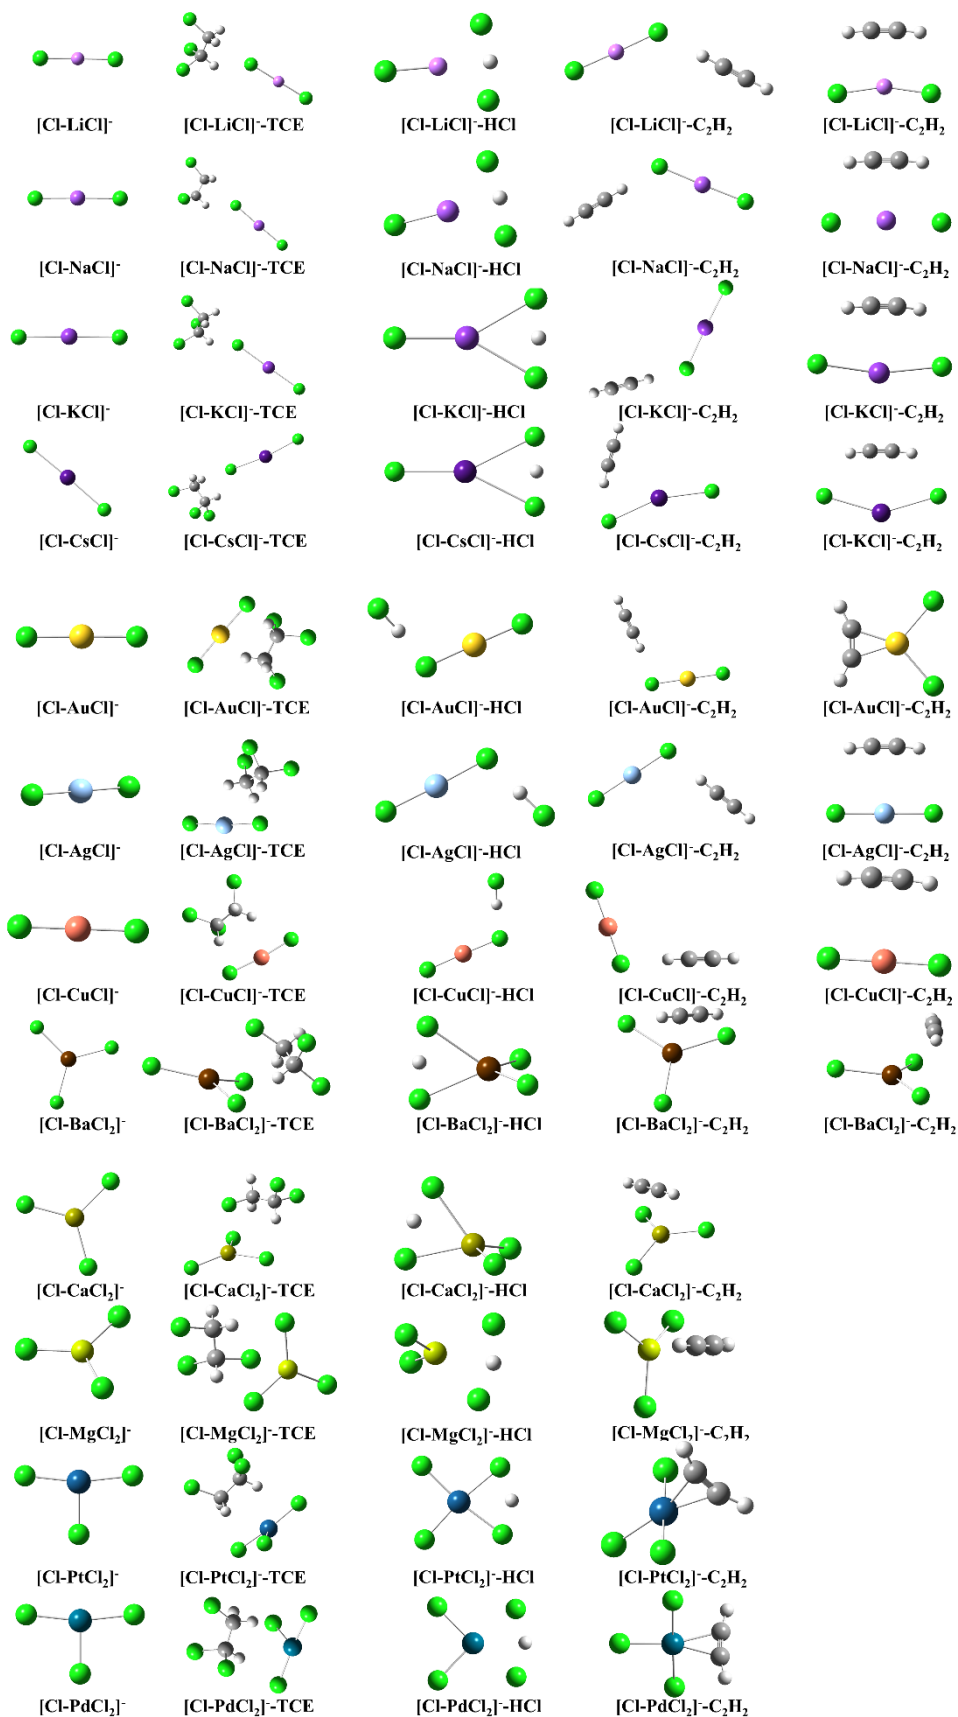

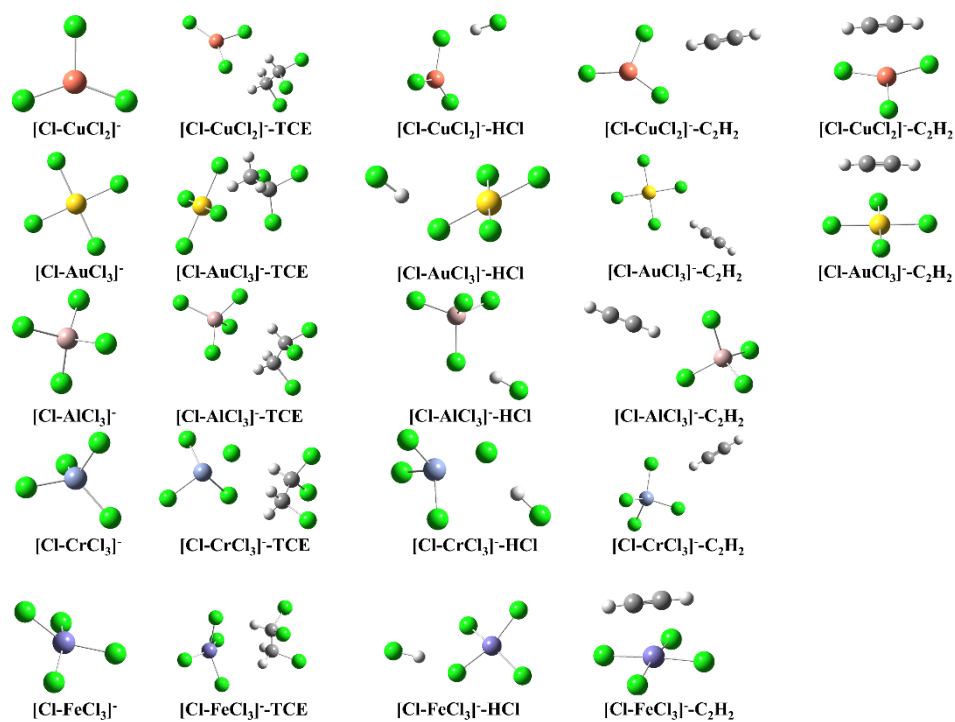

**Figure S1.** The structures of metal anions and the adsorption models of TCE, HCl and acetylene on these metal anions.

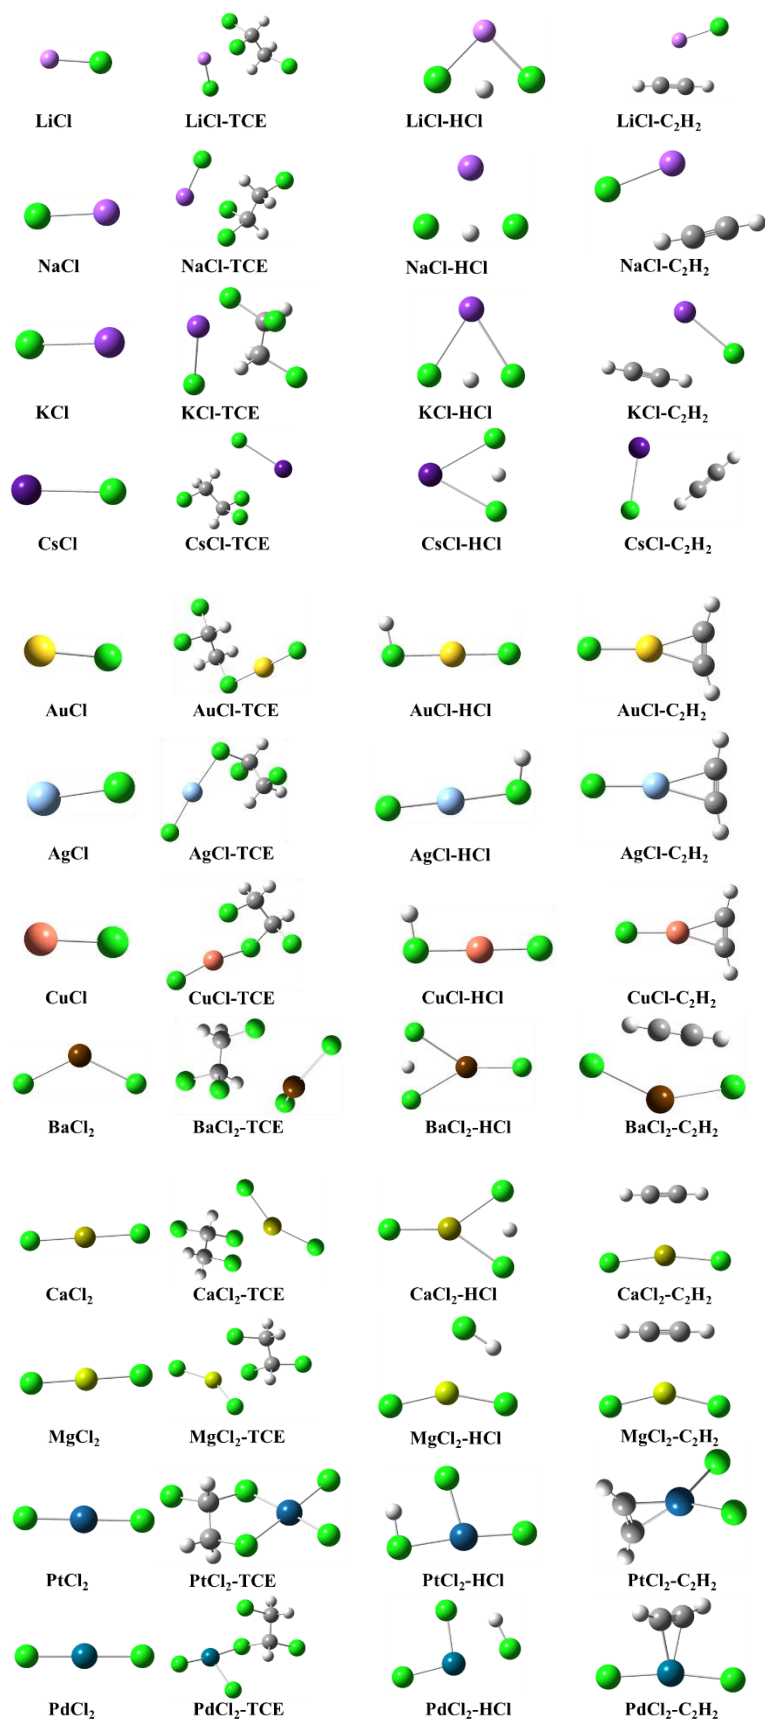

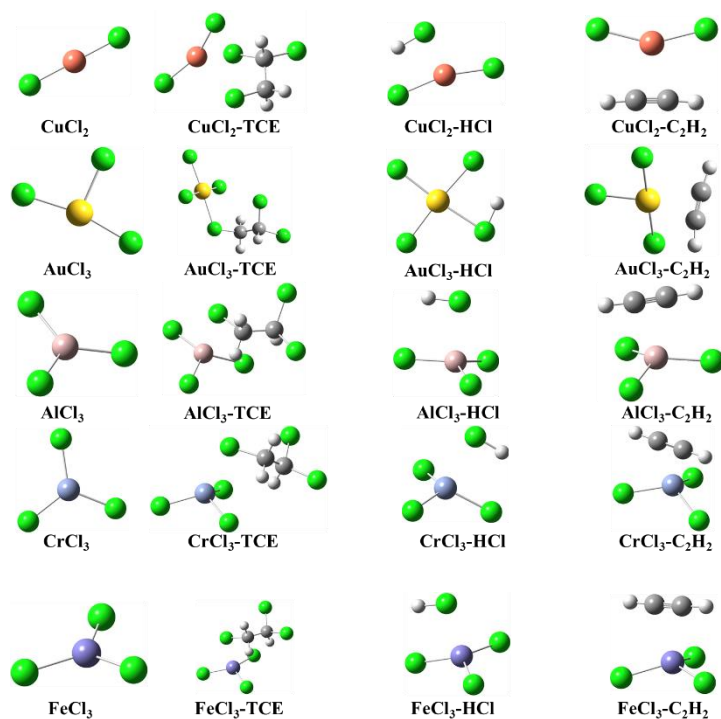

**Figure S2.** The structures of metal salts and the adsorption models of TCE, HCl and acetylene on these metal anions.

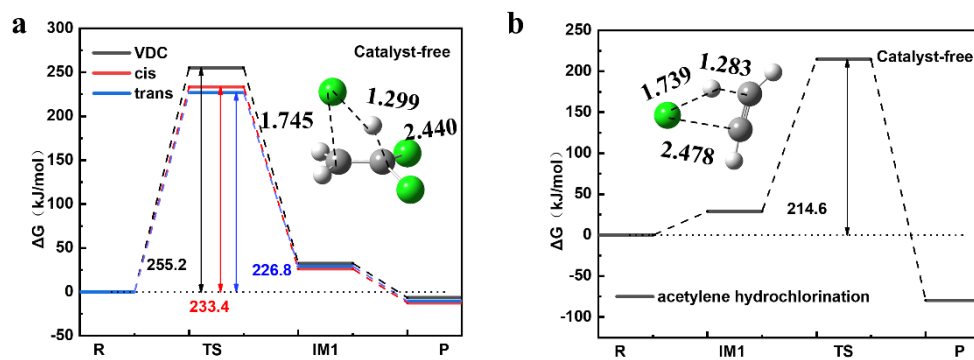

**Figure S3.**  $\Delta G$  of dehydrochlorination of TCE and acetylene hydrochlorination without catalysts.

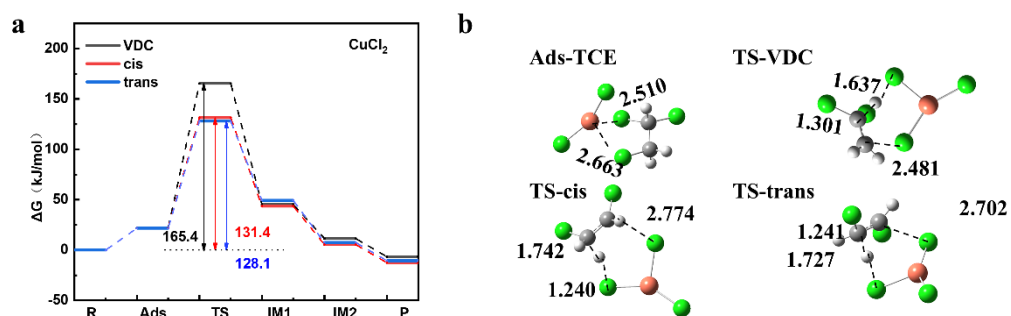

**Figure S4**  $\text{CuCl}_2$  catalyzed hydrochlorination mechanism pathways at 260 °C: a)  $\Delta G$  of  $\text{CuCl}_2$  catalyzed mechanism; b) structures of adsorption and transition states.



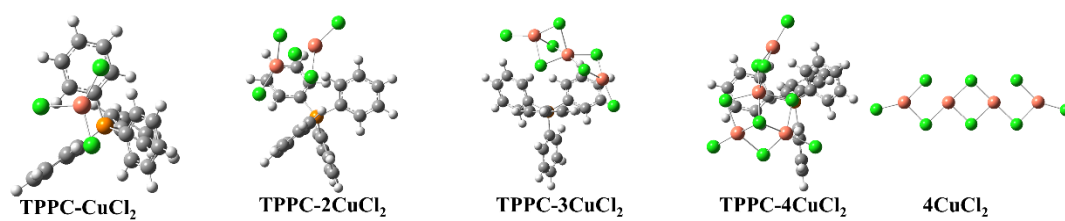

**Figure S5.** The adsorption of varying amounts of CuCl<sub>2</sub> in TPPC.

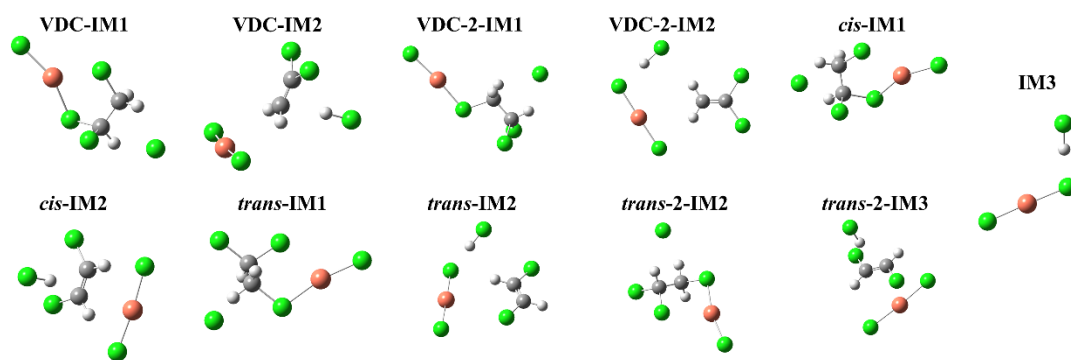

**Figure S6.** Partial structures of  $[\text{Cl-CuCl}]^-$  catalyzed dehydrochlorination mechanism pathways.

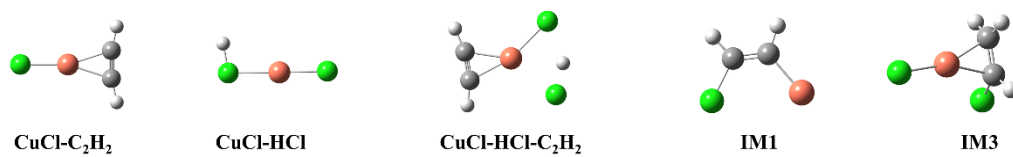

**Figure S7.** Partial structures of CuCl catalytic acetylene hydrochlorination pathways.

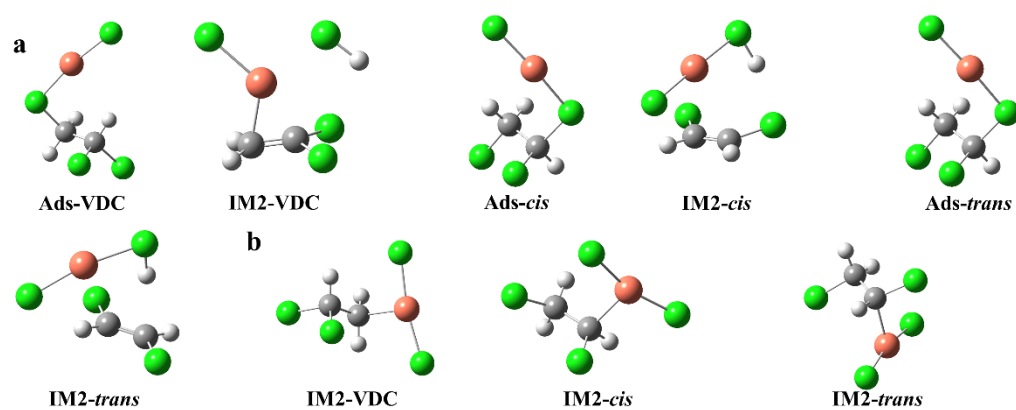

**Figure S8.** Partial structures of CuCl catalytic dehydrochlorination pathways.

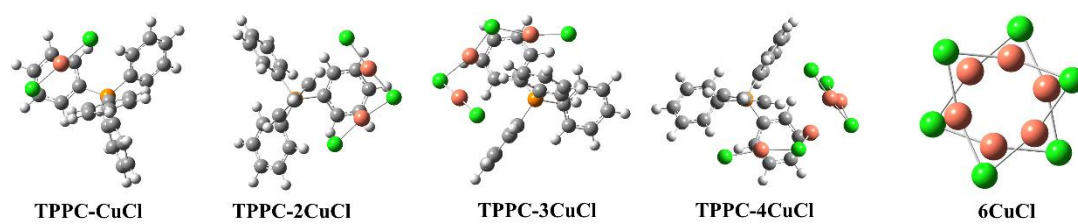

**Figure S9.** The structures of varying amounts of CuCl in TPPC.

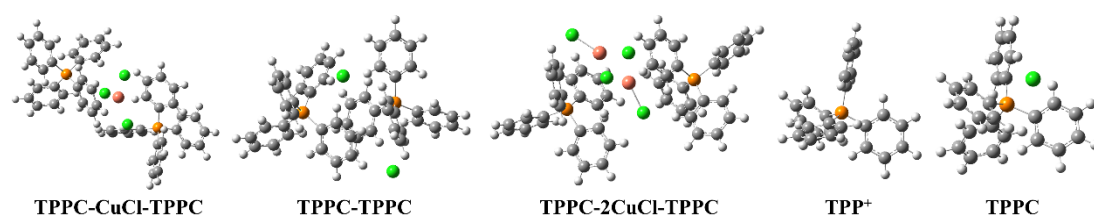

**Figure S10.** The structures of two CuCl ionic pairs in varying amounts of TPPC.

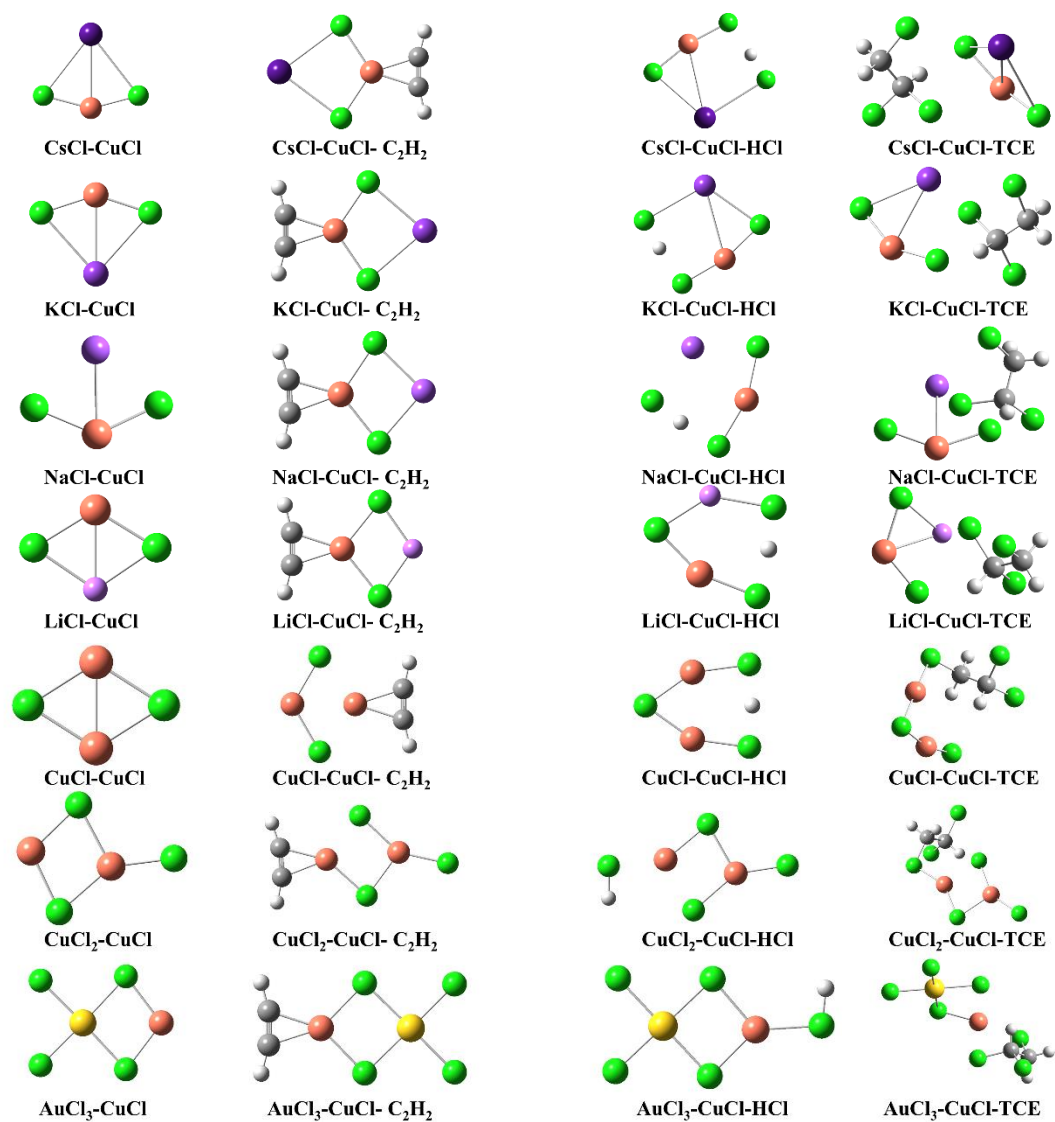

**Figure S11.** Ionic pairs structures and adsorption models.

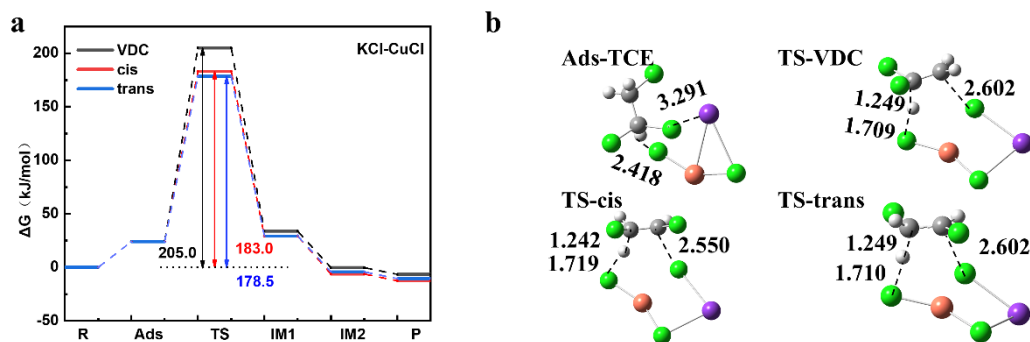

**Figure S12** KCl-CuCl catalyzed hydrochlorination mechanism pathways at 260 °C: a)  $\Delta G$  of KCl-CuCl catalyzed mechanism; b) structures of adsorption and transition states.



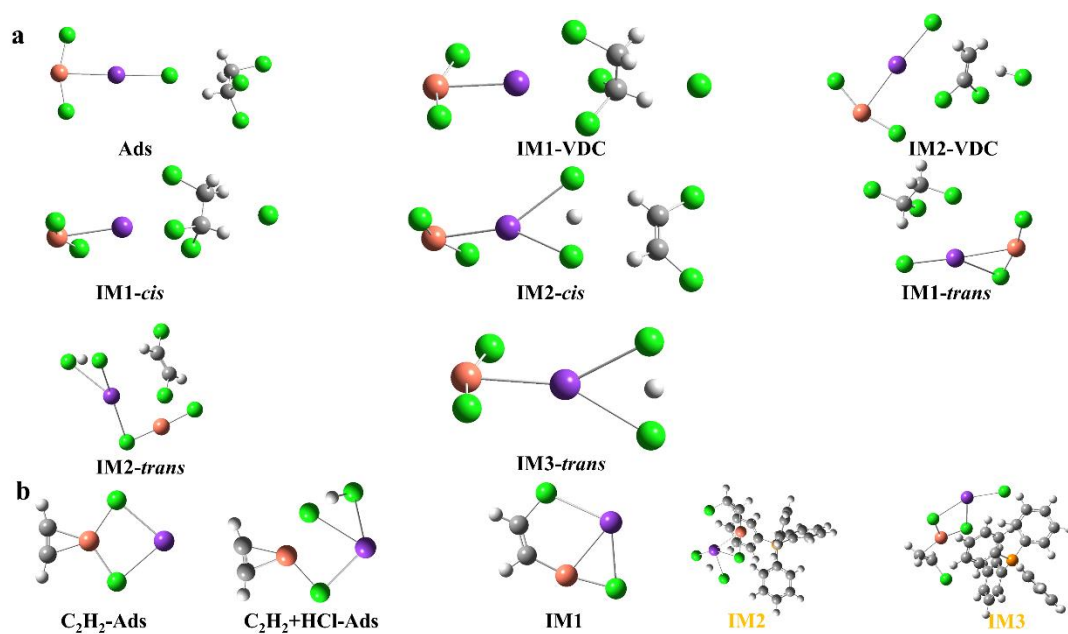

**Figure S13.** Partial structures of dehydrochlorination (a) and acetylene hydrochlorination (b) pathways.

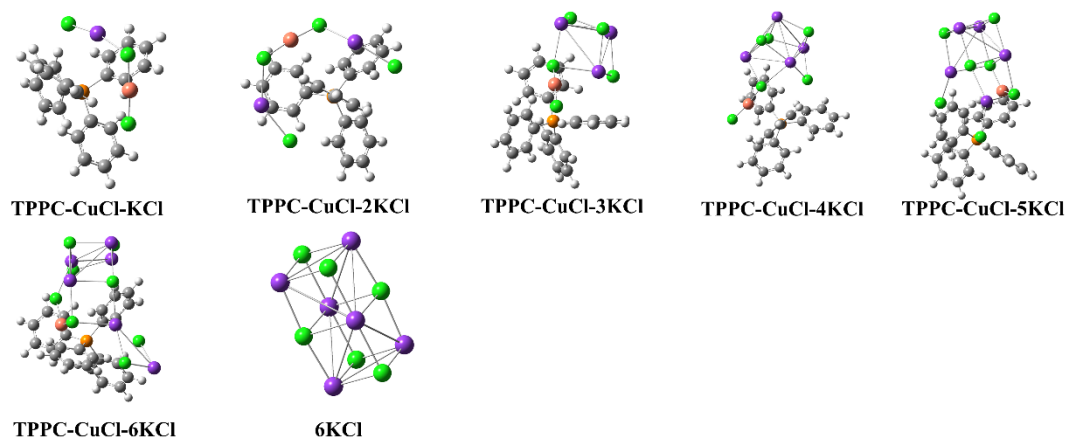

**Figure S14.** The structures of varying amounts of KCl in TPPC-CuCl.

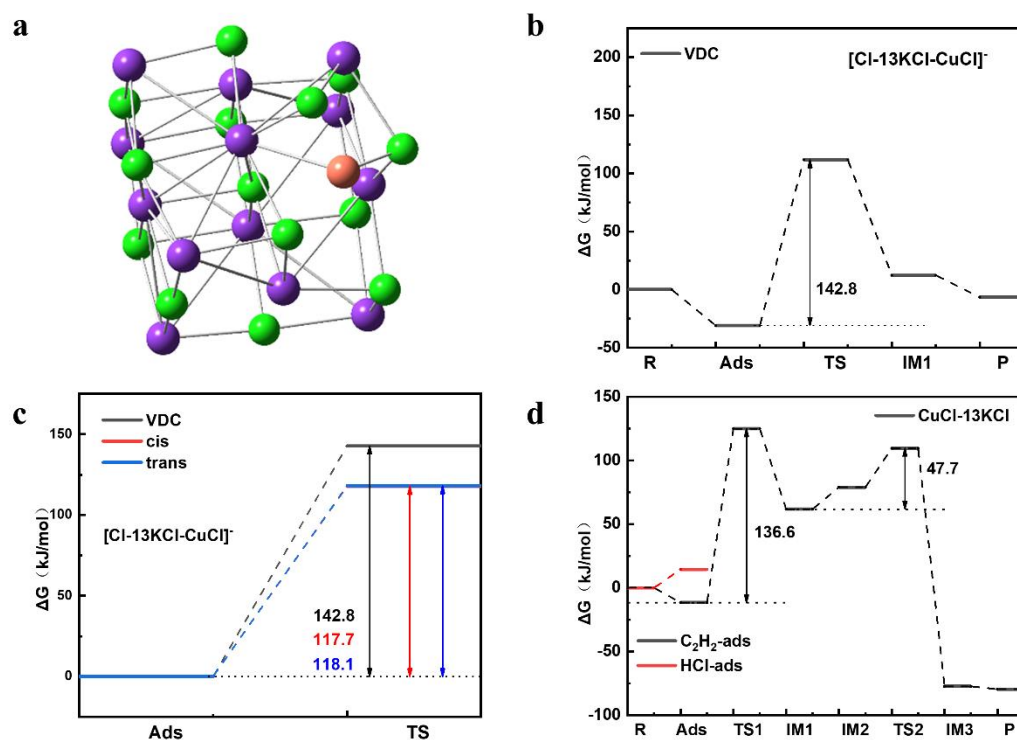

**Figure S15.** 13KCl-CuCl catalyzed mechanism pathways, a) b) the structure of 13KCl-CuCl; b) 13KCl-CuCl catalyzed dehydrochlorination for VDC; c)  $\Delta G$  of  $[\text{Cl-13KCl-CuCl}]^-$  catalyzed dehydrochlorination; d)  $\Delta G$  of 13KCl-CuCl catalyzed acetylene hydrochlorination pathway.

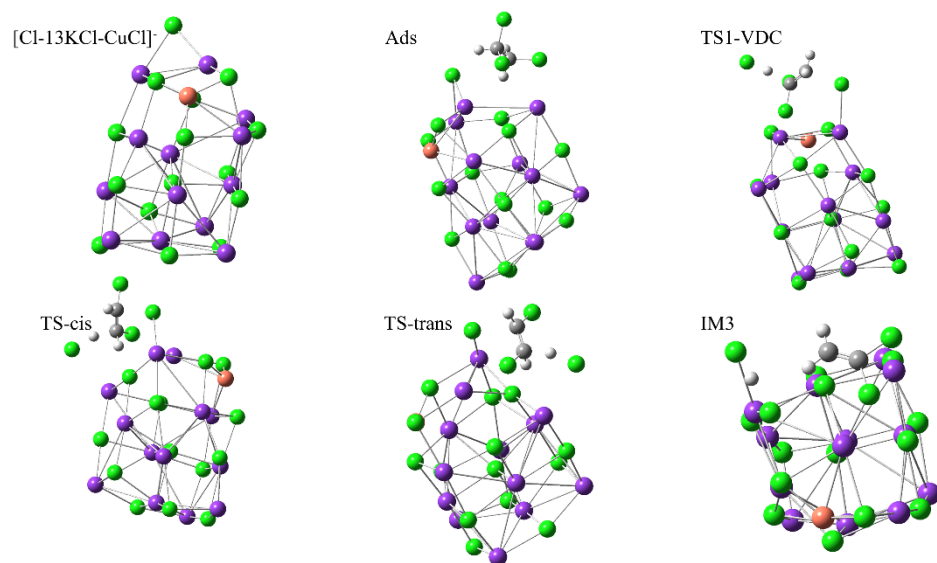

**Figure S16.** The structures of [Cl-13KCl-CuCl]<sup>-</sup> catalyzed dehydrochlorination pathway.

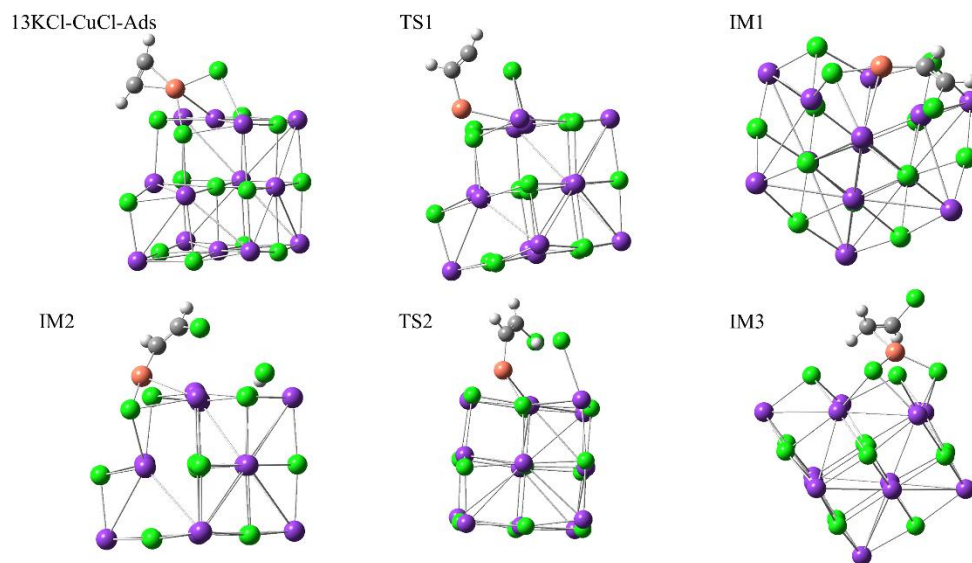

**Figure S17.** The structures of 13KCl-CuCl catalyzed acetylene hydrochlorination pathway.

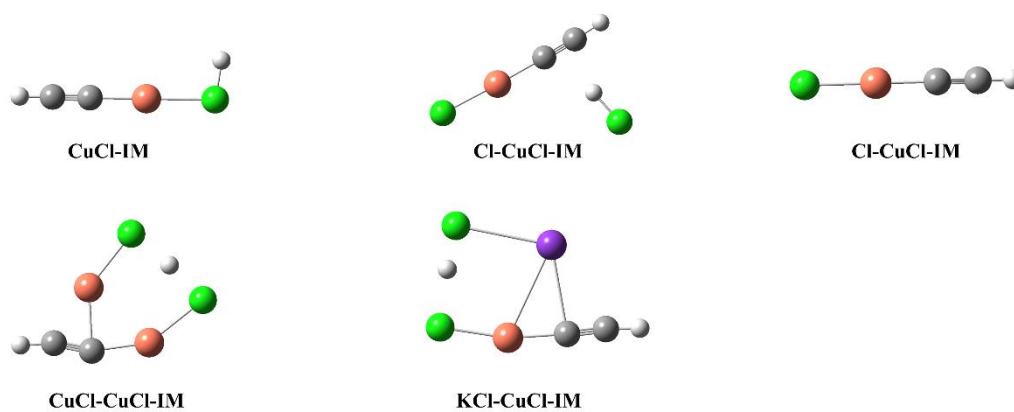

**Figure S18.** Partial structures in generation pathways of copper acetylide.

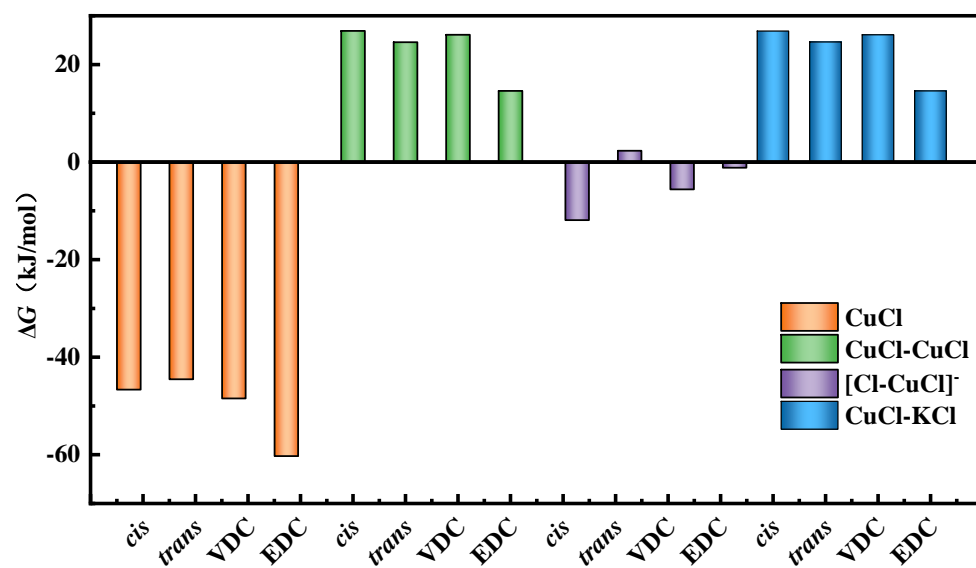

**Figure S19.** The adsorption  $\Delta G$  of olefin products on CuCl, CuCl-CuCl and  $[\text{Cl-CuCl}]^-$  at 260 °C.

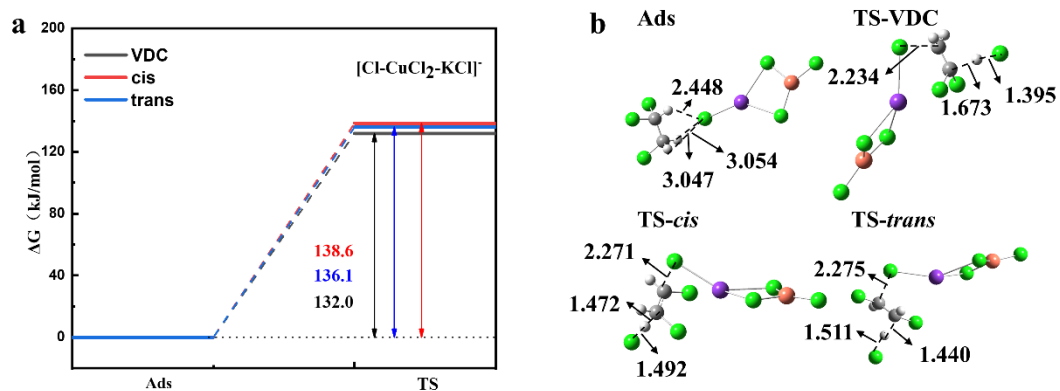

**Figure S20.**  $[\text{Cl-CuCl}_2\text{-KCl}]^-$  catalyzed dehydrochlorination mechanism pathways at 260 °C: a)  $\Delta G$  of  $[\text{Cl-CuCl}_2\text{-KCl}]^-$  catalyzed mechanism; b) structures of adsorption and transition states  $[\text{Cl-CuCl}_2\text{-KCl}]^-$  catalyzed mechanism.



**Table S1.** The adsorption  $\Delta G_{20\text{ }^{\circ}\text{C}}$  and  $\Delta G_{260\text{ }^{\circ}\text{C}}$  of HCl, C<sub>2</sub>H<sub>2</sub> and TCE at TPPC-CuCl, TPPC-CuCl<sub>2</sub> and TPPC-KCl-CuCl. (kJ/mol)

|                            | T/ $^{\circ}\text{C}$ | HCl   | C <sub>2</sub> H <sub>2</sub> | TCE   |
|----------------------------|-----------------------|-------|-------------------------------|-------|
| TPPC-CuCl                  | 20                    | -13.2 | 12.5                          | 4.6   |
|                            | 260                   | 13.0  | -                             | -     |
| [Cl-CuCl] <sup>-</sup>     | 20                    | -39.7 | -11.7                         | -34.2 |
|                            | 260                   | -27.7 | -6.1                          | -20.9 |
| TPPC-CuCl <sub>2</sub>     | 20                    | -9.2  | 12.2                          | -14.2 |
|                            | 260                   | 18.6  | -                             | 20.1  |
| TPPC-KCl-CuCl              | 20                    | -25.2 | 4.7                           | 20.3  |
|                            | 260                   | 4.5   | -                             | -     |
| [Cl-KCl-CuCl] <sup>-</sup> | 20                    | -52.6 | -5.5                          | -25.5 |
|                            | 260                   | -24.4 | 23.0                          | -6.5  |
| KCl-CuCl                   | 20                    | -21.7 | -38.6                         | 6.6   |
|                            | 260                   | 6.2   | -9.3                          | -     |
